# Supplementary material
Source: PubMed Central journal article supplement (PMC4291371)
Supplement: AAC.03305-14_zac001153599so1.pdf [file AAC.03305-14_zac001153599so1.pdf]

## Supplementary Material

### Supplementary Table S1. *In vitro* toxicity of cationic liposomes Supplementary Figure S1

| Formulation | RBC lysis assay | LDH assay |
|-------------|-----------------|-----------|
| PC-CTAB     | >1200           | >1500     |
| PC-DTAB     | >1000           | >1250     |
| PC-DDAB     | >1250           | >1000     |
| PC-SA       | >1000           | >500      |
| PC-DOTAP    | >1250           | >1500     |

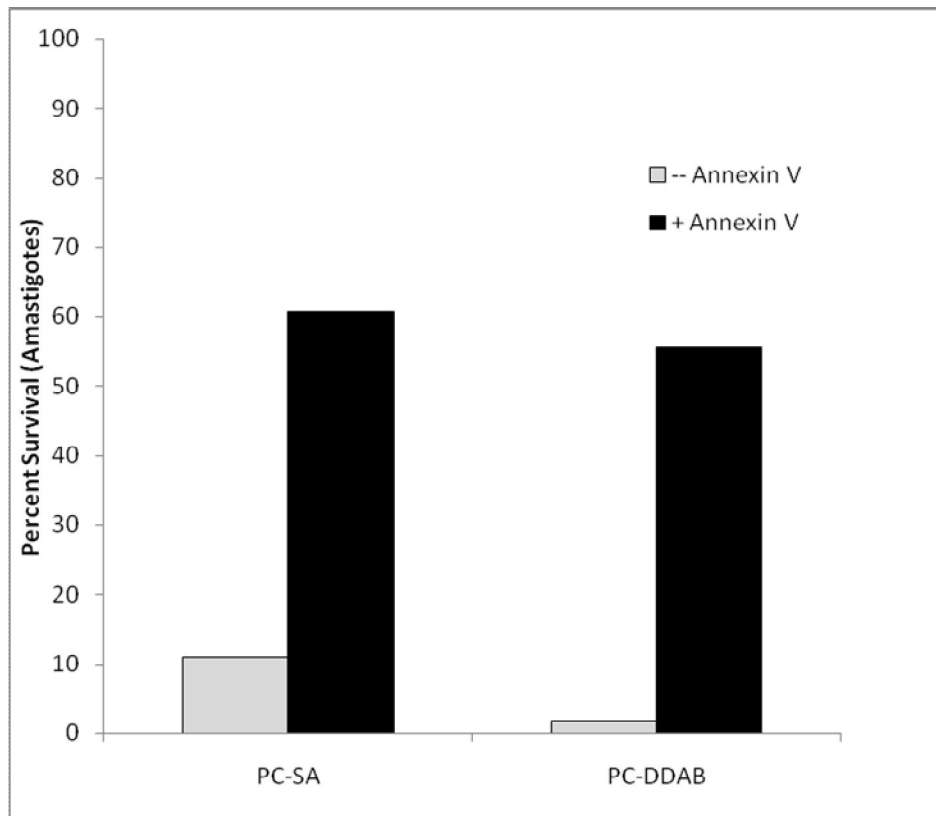

**Figure S 1.** Blocking of leishmanicidal activity of PC-SA and PC-DDAB liposomes by annexinV. AG83 amastigotes were incubated with (black bars) or without (grey bars) annexinV ( $2 \mu\text{g}/ 2 \times 10^6$  cells) at  $26^\circ\text{C}$  for 30 min in binding buffer. Liposomes were added subsequently and viability of the parasites was determined by MTT assay after 60 min. The graph represents mean of one experiment performed in triplicates.
